1 **Molecular changes during extended neoadjuvant letrozole treatment of**  
2 **breast cancer: distinguishing acquired resistance from dormant tumours**

3 Cigdem Selli<sup>1,2</sup>, Arran K. Turnbull<sup>1,3</sup>, Dominic A. Pearce<sup>1</sup>, Ang Li<sup>1</sup>, Anu Fernando<sup>1,3</sup>, Jimi  
4 Wills<sup>4</sup>, Lorna Renshaw<sup>3</sup>, Jeremy S. Thomas<sup>3</sup>, J. Michael Dixon<sup>3</sup>, Andrew H. Sims<sup>1\*</sup>

5

6 <sup>1</sup> Applied Bioinformatics of Cancer, University of Edinburgh Cancer Research UK Centre,  
7 MRC Institute of Genetics and Molecular Medicine, Edinburgh, UK

8 <sup>2</sup> Department of Pharmacology, Faculty of Pharmacy, Ege University, 35040, Izmir, Turkey

9 <sup>3</sup> Edinburgh Breast Unit, Western General Hospital, Edinburgh, UK

10 <sup>4</sup> Mass Spectrometry Unit, MRC Institute of Genetics and Molecular Medicine, Edinburgh,  
11 UK

12

13 \*Corresponding author: Andrew H Sims, PhD, Tel: + 44 (0) 131 651 8595;

14 [andrew.sims@ed.ac.uk](mailto:andrew.sims@ed.ac.uk)

15 Cigdem Selli, [cigdem.sellli@ed.ac.uk](mailto:cigdem.sellli@ed.ac.uk)

16 Arran K. Turnbull, [arran.turnbull@ed.ac.uk](mailto:arran.turnbull@ed.ac.uk)

17 Dominic A. Pearce, [dominic.pearce@ed.ac.uk](mailto:dominic.pearce@ed.ac.uk)

18 Ang Li, [s1667626@sms.ed.ac.uk](mailto:s1667626@sms.ed.ac.uk)

19 Anu Fernando, [anu.fernando@ed.ac.uk](mailto:anu.fernando@ed.ac.uk)

20 Jimi Wills, [jimi.wills@ed.ac.uk](mailto:jimi.wills@ed.ac.uk)

21 Lorna Renshaw, [lorna.renshaw@nhslothian.scot.nhs.uk](mailto:lorna.renshaw@nhslothian.scot.nhs.uk)

22 Jeremy S. Thomas, [jeremy.thomas@nhslothian.scot.nhs.uk](mailto:jeremy.thomas@nhslothian.scot.nhs.uk)

23 J. Michael Dixon, [mike.dixon@ed.ac.uk](mailto:mike.dixon@ed.ac.uk)

24

## 1 **Abstract**

2 **Background:** The risk of recurrence for endocrine-treated breast cancer patients persists for  
3 many years or even decades following surgery and apparently successful adjuvant therapy.  
4 This period of dormancy and acquired resistance is inherently difficult to investigate,  
5 previous efforts have been limited to *in vitro* or *in vivo* approaches. In this study, sequential  
6 tumour samples from patients receiving extended neoadjuvant endocrine treatment were  
7 characterised as a novel clinical model.

8 **Methods:** Consecutive tumour samples from 62 patients undergoing extended (4-45 months)  
9 neoadjuvant aromatase inhibitor, letrozole, therapy were subjected to transcriptomic and  
10 proteomic analysis, representing before ( $\leq 0$ ), early-on (13-120 days) and long-term ( $>120$   
11 days) neoadjuvant letrozole treatment. Patients with at least a 40% initial reduction in tumour  
12 size by 4 months of treatment were included. Of these, 42 patients with no subsequent  
13 progression were classified as “dormant”, and the remaining 20 patients as “acquired  
14 resistant”.

15 **Results:** Changes in gene expression in dormant tumours begin early and become more  
16 pronounced at later timepoints. Therapy-induced changes in resistant tumours were common  
17 features of treatment, rather than being specific to resistant phenotype. Comparative analysis  
18 of long-term treated dormant and resistant tumours highlighted changes in epigenetics  
19 pathways including DNA methylation and histone acetylation. DNA methylation marks 5-  
20 methylcytosine and 5-hydroxymethylcytosine were significantly reduced in resistant tumours  
21 compared to dormant tissues after extended letrozole treatment.

22 **Conclusions:** This is the first patient-matched gene expression study investigating long-term  
23 aromatase inhibitor-induced dormancy and acquired resistance in breast cancer. Dormant  
24 tumours continue to change during treatment whereas acquired resistant tumours more

1 closely resemble their diagnostic samples. Global loss of DNA methylation was observed in  
2 resistant tumours under extended treatment. Epigenetic alterations may lead to escape from  
3 dormancy and drive acquired resistance in a subset of patients supporting a potential role for  
4 therapy targeted at these epigenetic alterations in the management of endocrine resistant  
5 breast cancer.

6 **Keywords:** dormancy, endocrine treatment, epigenetics, letrozole, sequential samples,  
7 resistance, microarray, proteomics

## 8 **Background**

9 Approximately 70% of breast cancer patients who have oestrogen receptor alpha (ER)  
10 positive tumours receive adjuvant endocrine treatment. Five years of aromatase inhibitor  
11 therapy produces a 40% reduction in 10-year mortality [1]. However, while the annual risk of  
12 mortality for ER-negative breast cancer decreases following the first five years after  
13 diagnosis, the annual rate remains constant for ER+ patients [2]. In fact, women with ER+  
14 early-stage disease treated with 5 years of adjuvant endocrine therapy have a persistent risk of  
15 recurrence and death from breast cancer for at least 20 years after diagnosis [3]. Molecular  
16 studies have demonstrated that nodal and distant metastasis are highly similar to their  
17 matched primary tumours, implicating a continuation of original cancer [4-6]. However, the  
18 time between treatment and recurrence is often greater than that which can be explained by  
19 normal cell-doubling rates [7], implying cancer cells remain dormant in the body before re-  
20 awakening.

21 Residual dormant cancer cells are hypothesised to persist either by withdrawing from the cell  
22 cycle and transitioning to a quiescence state or by continuing to proliferate at a reduced rate,  
23 counter-balanced by cell death [8]. Reawakened dormant cells may become detectable after  
24 reaching a detection threshold or reactivated via increased angiogenesis, and/or escape from

1 inhibitory microenvironment or immune effects [9, 10]. Dormancy is therefore considered a  
2 major mechanism underlying resistance to therapy, where dormant cells survive despite anti-  
3 proliferative endocrine treatment.

4 Resistance to endocrine therapy may occur at disease inception (*de novo* or innate resistance),  
5 but a larger proportion of patients acquire resistance during treatment (acquired/secondary  
6 resistance) [11]. Several mechanisms of endocrine resistance have been described previously  
7 [12, 13]. However, the majority of these findings are based on preclinical data obtained from  
8 cell lines and animal models. It is therefore difficult to know if these accurately reflect  
9 molecular changes in patient tumours.

10 Expression profiling of clinical samples, measuring the effect of, or predicting response to  
11 treatment has recently become feasible. However, experimental design issues, such as the  
12 difficulty in obtaining paired samples for comparison particularly for longer time intervals,  
13 makes it difficult to study changes within tumours [14]. For example, a previous study  
14 investigating tamoxifen failure compared samples from patients requiring salvage surgery  
15 with pre-treatment samples from an unrelated group of disease-free patients [15]. More  
16 recently, sequential patient-matched samples have been successfully utilised to determine  
17 treatment-induced dynamic changes in tumours at 2 weeks to 3 months, demonstrating the  
18 effectiveness of this approach [16-18].

19 For a variety of reasons, including being unfit for surgery, a proportion of patients receiving  
20 pre-surgical endocrine treatment do not have their tumours excised following 3-4 months of  
21 treatment. These long-term endocrine-treated tumours represent a unique group that can  
22 inform how tumours respond to extended oestrogen deprivation *in situ*. Having initially  
23 shrunk in size, some tumours remain at a steady volume and appear dormant, whilst others  
24 subsequently begin to regrow. We have utilised this unique cohort of sequential samples from

1 patients receiving extended-neoadjuvant endocrine treatment to characterise luminal breast  
2 cancer dormancy and acquired resistance using as a novel clinical model.

### 3 **Methods**

#### 4 **Patients and samples**

5 Breast cancer patients were treated with neoadjuvant letrozole (Femara, 2.5 mg; Novartis  
6 Pharma AG, Basel, Switzerland) for a minimum of four months, tumours were not removed  
7 either because patients declined or were unfit for surgery. The study was approved by the  
8 local regional ethics committee (07/S1103/26, August 2007) and all patients gave informed  
9 consent. Clinical characteristics of the tumours are given in Table 1. Cohort size with  
10 inclusion and exclusion criteria are given in Additional file 1: Figure S1. Patients with >40%  
11 initial decrease in tumour size by 4 months of treatment were included in the study. Those  
12 with no subsequent progression on imaging by the latest biopsy were classified as “dormant”,  
13 otherwise, they were classified as “acquired resistant” (Fig. 1a-b). For patients whose latest  
14 USS measurement was taken more than a month before surgery, changes in three widely used  
15 proliferation markers (MKI67, PCNA and, MCM2) were used to assist classification.  
16 Sequential tumour biopsies were taken with a 14-gauge needle before and after letrozole  
17 treatment and at the time of surgery. Fresh samples were snap-frozen in liquid nitrogen and  
18 each tumour sample confirmed to contain  $\geq 50\%$  cellularity and at least 60% tumour tissue  
19 using H&E sections. Following pulverisation of tissue with a membrane disruptor (Micro-  
20 Dismembrator U, Braun Biotech), phase separation was performed by guanidinium  
21 thiocyanate-phenol-chloroform extraction (Qiazol Lysis Reagent).

#### 22 **Gene expression profiling and analysis**

23 RNA was extracted from the aqueous phase by column-based purification (RNeasy mini kit,  
24 Qiagen) and then labelled and hybridized (HumanHT-12 v4 Illumina BeadChip) according to

1 manufacturer's protocol (NuGEN) as previously described [19, 20]. Raw data was detection  
2 ( $p < 0.05$ ,  $\geq 3$  samples) and quality filtered, log<sub>2</sub> transformed, and quantile normalized using  
3 the Bioconductor lumi package [21]. Data is available from NCBI GEO under accession  
4 GSE111563. The analysis also includes data from 14 patients (42 samples, GSE59515) and 9  
5 patients (24 samples, GSE55374) from previous studies [16, 19]. Hierarchical clustering  
6 analysis was performed using a complete linkage method. Pathway enrichment analysis and  
7 visualisation were performed using ReactomePA [22]. Differential gene expression analysis  
8 was performed with Rank Products [23]. The significance of differences was evaluated by  
9 using unpaired Wilcoxon test for two groups and ANOVA with post-hoc Tukey HSD for  
10 multiple comparisons.

#### 11 **Proteomics analysis**

12 Proteins were isolated from the organic phase of Qiazol [24]. Pellets were sonicated and  
13 dissolved in 1% SDS. Proteomics was performed using Thermo Q Exactive plus and Label-  
14 free Quantitation (LFQ). Peptides obtained from samples were analysed in mass spectrometry  
15 runs, serial samples from the patients were run on the same day. A modified version of Filter  
16 Aided Sample Preparation (FASP) was performed using serial digests with lysC and trypsin  
17 to generate two orthogonal fractions per sample [25, 26]. The mass spectrometry spectra  
18 generated in each run was used for relative quantitation of individual peptides. Normalization  
19 and quantifications of peptides were performed using MaxLFQ and MaxQuant [27]. A total  
20 of 6251 protein groups were identified. Data was log<sub>2</sub> transformed and missing values were  
21 imputed as the minimum observed value in each sample. The data have been deposited to the  
22 ProteomeXchange Consortium via the PRIDE [28] partner repository with the dataset  
23 identifier PXD009328.

#### 24 **Immunohistochemistry and scoring**

1 Formalin-fixed paraffin-embedded (FFPE) sections were processed using an automated  
2 stainer (Leica Biosystems, Bond III). Heat-induced epitope retrieval for both antibodies was  
3 done by 30-minute incubation in citrate based pH 6.0 epitope retrieval (ER1) solution  
4 followed by incubation in 3.5 N HCl for 15 min at room temperature as suggested by Haffner  
5 *et.al.* [29]. For 5-methylcytosine (5-mC) and 5-hydroxymethylcytosine (5-hmC) detection,  
6 mouse monoclonal 5 methylcytosine specific [33D3] (Abcam, ab10805) and rabbit  
7 polyclonal 5-hydroxymethylcytosine (Active Motif, 39769) antibodies were used  
8 respectively. Both antibodies were used at 1/1000 dilution and were incubated for 15 min.  
9 Detection was performed by using secondary antibody-horseradish peroxidase (HRP)  
10 conjugates and substrate-chromogen (DAB). After staining, slides were counterstained with  
11 haematoxylin. Nuclear staining in epithelial cells was evaluated using an H-score obtained by  
12 multiplying the intensity of the stain (0: no staining; 1: weak staining; 2: moderate staining;  
13 3: intense staining) by the percentage of cells (H-score range, 0 to 300).

## 14 **Results**

### 15 **Long-term endocrine therapy as a model of dormancy and acquired resistance**

16 A cohort of 62 primary breast cancer patients receiving at least 4 months of endocrine  
17 treatment (Fig. 1a) were stratified into two groups, ‘dormant’ and ‘acquired resistant’ based  
18 on dynamic changes in tumour size and proliferation (Fig. 1b). Patient-matched sequential  
19 samples were available at three time-points, before (pre,  $\leq 0$  days), early-on (early, 13-120  
20 days) and long-term (long,  $>120$  days) treatment. Dormant and acquired resistant samples  
21 were distributed uniformly with respect to time on treatment, and duration at each time point  
22 was not significantly different between response groups (Table 1). For long-term treatment,  
23 the mean and range were 186 (121-884) days and 226 (121-1366) days, for dormant and  
24 acquired resistant patients respectively (Fig. 1c).

1 There were no significant differences in patient clinico-pathological features between  
2 response classes before treatment (Table 1). However, PAM50 intrinsic molecular subtypes  
3 were found to change during endocrine treatment (Fig. 1d). These changes were consistent  
4 with known associations with outcome, with all dormant tumours either remaining the same,  
5 or switching to better prognosis luminal A or normal-like tumours. For resistant tumours,  
6 however, 25% (5 out of 20) switched to a subtype of worse prognosis (Fig. 1d).

7 As expected, Kaplan-Meier survival analysis demonstrated significantly worse outcomes for  
8 resistant compared to dormant patients (log rank,  $p = 0.026$ , Fig. 1e). Recurrence rates for  
9 dormant and resistant patients were 21% (9/42) and 45% (9/20), respectively. Moreover,  
10 resistant patients suffered significantly earlier recurrences compared to dormant patients ( $p =$   
11  $0.05$ ; range = 26-947 vs 136-2042 days; Fig. 1f).

### 12 **Distinct transcriptomic changes under long-term letrozole treatment**

13 Unsupervised analysis was performed to consider whether sequential samples displayed  
14 greater similarity between response classes or treatment duration. Hierarchical clustering  
15 using the 500 genes with the highest variance across all samples revealed two main  
16 subclasses, seemingly driven by time on treatment, with resistant and dormant tumours  
17 indistinguishable. When long-term treated samples were considered alone, two clusters did  
18 emerge, the larger of which contained a majority of dormant samples (79%), whilst the  
19 second had a roughly even proportion of dormant (48%) and resistant (52%) samples (Fig.  
20 2a). Similarly, a multidimensional scaling (MDS) plot revealed consistent changes over time  
21 in response to treatment for both dormant and acquired resistant samples (Fig. 2b), although  
22 long-term dormant samples were much more distinguishable from pre-treatment samples than  
23 the long-term acquired resistant samples (Fig. 2b).

24 Correlations between tumours from different individuals (inter-patient) remained similar at  
25 each time point and were not different between response classes (not shown). However,



1 correlations between matched sequential samples (intra-patient) revealed that pre-treatment  
2 samples were significantly ( $p = 0.01$ ) less similar to their long-term treated pairs (median =  
3 0.89, range = 0.74-0.95) than their early-on treatment pairs (median = 0.91, range = 0.84-  
4 0.95) (Fig. 2c). However, when divided by dormancy status this finding was only significant  
5 ( $p = 0.01$ ) for dormant patients (Fig. 2c), suggesting that dormant tumours continue to  
6 diverge transcriptionally, whereas acquired resistant tumours do not consistently differ after  
7 initial or extended treatment, as mirrored in the MDS representation (Fig. 2b).

### 8 **Changes in genes/pathways following long-term letrozole treatment**

9 Pairwise Rank Product analysis (pre- vs. long-term treatment, FDR < 0.01) of dormant  
10 patients identified 2319 genes significantly differentially expressed (1063 down- and 1256  
11 up-regulated) (Additional file 2: Table S1). These genes were significantly enriched ( $p <$   
12 0.01) for a total of 62 and 26 pathways, respectively (Additional file 2: Table S2), including  
13 reductions in cell cycle, senescence, DNA methylation and an increase in extracellular matrix  
14 (ECM) organization. These findings are consistent with previous studies of patient-matched  
15 sequential endocrine treated samples [16-18]. Acquired resistant tumours displayed much  
16 fewer consistently differentially expressed genes (238, 63 down- and 175 up-regulated)  
17 between long-term treated and pre-treatment samples (Additional file 2: Table S3). Genes  
18 that were up-regulated in resistant patients were enriched for several of the same pathways as  
19 dormant tumours (ECM organization, Elastic fibre formation and Platelet degranulation), but  
20 down-regulated genes were much more variable (Additional file 2: Table S4; Fig. 3a-b).

21 Having determined that dormant and acquired resistant tumours have somewhat distinct  
22 changes during treatment at the molecular level, the question remained as to whether these  
23 changes tend to occur at earlier time points or were specific to long-term treatment. For  
24 dormant tumours, differential expression begins early-on, but becomes more pronounced at  
25 later timepoints (Fig. 3a). Down-regulated genes were most evident early-on treatment for

1 resistant patients, consistent with their initial response to treatment; whilst up-regulated genes  
2 were most changed after long-term treatment, potentially suggesting that these genes may  
3 mediate acquired resistance (Fig. 3b). We further examined whether differentially expressed  
4 genes identified in each response class were shared (Fig. 3c-d). Both down- and up-regulated  
5 genes identified in resistant tumours were significantly changed ( $p < 0.01$ ) in dormant  
6 patients (Fig. 3d). However, only up-regulated genes identified in dormant patients were  
7 significantly up-regulated in resistant patients without any change in down-regulated genes  
8 (Fig. 3c), implicating a partial lack of response to treatment at the molecular level in acquired  
9 resistance patients.

#### 10 **A potential role of epigenetic regulation in acquired resistance**

11 The above findings suggested that therapy-induced dynamic changes in genes and pathways  
12 are common features of long-term treatment, rather than being specific to dormant or resistant  
13 phenotypes. This led us to perform comparative analysis of dormant and acquired resistant  
14 tumours at long-term time-point to identify any specific differences. Unpaired Rank Product  
15 analysis ( $FDR < 0.01$ ) revealed a total of 419 genes (170 down- and 249 up-regulated) to be  
16 differentially expressed between long-term treated dormant and resistant tumours (Additional  
17 file 2: Table S5; Fig. 4a). These genes were significantly enriched in 27 pathways ( $p < 0.05$ ),  
18 including several epigenetics-related pathways, including “DNA methylation”, “PRC2  
19 methylates histones and DNA”, “histone acetyl transferases (HATs) acetylate histones”,  
20 “epigenetic regulation of gene expression” as well as senescence and cell cycle (Additional  
21 file 2: Table S6; Fig. 4b). Examination of the expression of these genes alone, demonstrated  
22 that they could partially separate dormant from majority of resistant tumours (Fig. 4c).  
23 Single-sample Gene Set Enrichment Analysis (ssGSEA) [30] was performed to quantitatively  
24 score the activity of differentially expressed genes in every sample. The differentially up-

1 regulated genes' score was significantly higher in acquired resistant compared to dormant  
2 tumours under early-on ( $p < 0.05$ ) as well as long-term ( $p < 0.001$ ) treatment (Fig. 4d).

3 Our results prompted us to examine whether the changes we observed in clinical samples  
4 were similarly changed in experimental models of resistant breast cancer cells. Oestrogen  
5 receptor-positive MCF7 cells stably transfected with the aromatase gene (MCF7aro cells) and  
6 long-term oestrogen-deprived (LTED) breast cancer cells have been widely used to  
7 understand mechanisms of aromatase inhibitor resistance *in vitro*. Examining two publicly  
8 available gene expression datasets (GSE10879 and GSE10911) demonstrated that genes  
9 differentially expressed between acquired resistant and dormant tumours were significantly  
10 enriched in aromatase inhibitor-resistant cells compared to sensitive/control cells (Fig. 5a). In  
11 two out of three *in vitro* studies with dynamic gene expression data from LTED MCF7 cells  
12 with an initial decrease in ssGSEA scores mimicking the dormancy/responsive state was  
13 followed by a later-on increase representing acquired resistance (Fig. 5b), further validating  
14 our results and emphasizing the utility of these *in vitro* models. Interestingly, no significant  
15 difference was observed in tamoxifen- and fulvestrant-resistant MCF7 cells compared to  
16 drug-sensitive control cells (Fig. 5c) suggesting the specificity of the results to aromatase  
17 inhibitor therapy resistance.

18 In addition, proteomic analysis of a subset of samples was performed which revealed  
19 differential expression in 656 proteins (279 down-, 377 up-regulated) between long-term  
20 treated dormant and resistant tumours (Rank Product;  $p < 0.05$ ;  $n = 10$ ; Additional file 2:  
21 Table S7; Fig. 5d). A total of 36 features including S100P and HIST2H3A (H3.2) overlapped  
22 between proteomics and transcriptomics, validating the results with a different approach.

23 Next, we considered which drugs might be able to reverse the differences in gene expression  
24 between dormant and resistant tumours using Connectivity Map (CMap), the pattern  
25 matching software, and a collection of gene-expression profiles from cultured human cells

1 treated with various treatments [31]. Drugs that are negatively associated with the resistance  
2 signature could potentially reverse the differences observed. A histone deacetylase (HDAC)  
3 inhibitor Trichostatin A had the second lowest score (-0.90) and has previously been shown  
4 to re-sensitise tamoxifen-unresponsive ER-negative breast cancer cells *in vitro* [32].  
5 Clioquinol an anti-parasitic and apoptotic drug with HDAC inhibitory effects [33] was also  
6 highlighted. Letrozole had a positive score of 0.89 further confirming the reliability of the  
7 predictions and hypothetical scores calculated by CMap. Furthermore, differentially  
8 expressed genes were uploaded to Enricher (ENCODE Histone modification 2015 dataset)  
9 [34] to determine histone modification enrichment. Two H3 lysine methylation modifications  
10 (H3K27me3 and H3K4me1) were enriched significantly (Adjusted  $p = 0.0003$  and  $p = 0.004$ ,  
11 respectively) whereas no enrichment for histone acetylation was determined.

12 Finally, immunohistochemical evaluation of FFPE sections revealed significantly lower  
13 global 5-mC and 5-hmC levels in resistant tumours compared to dormant tumours under  
14 extended treatment (Fig. 6a-b). Significantly lower 5-hmC levels in acquired resistant  
15 compared to dormant tumours were also observed at early on-treatment (Fig. 6b), suggesting  
16 hypomethylation may be predictive of emergence from dormancy.

## 17 **Discussion**

18 Understanding the mechanisms underlying the maintenance of and escape from dormancy  
19 have great importance considering most cancer-related deaths are caused by metastasis rather  
20 than the primary tumour. In this study, we describe the first sequential patient-matched  
21 clinical dataset of extended endocrine treatment in breast cancer. The results highlight the  
22 difficulty of distinguishing dormant and resistant tumours, with dynamic molecular changes  
23 of treatment being highly similar between the groups. However, comparative analysis

1 revealed a set of genes significantly up-regulated in resistant patients within the first months  
2 of letrozole treatment suggesting a predictive role for changes in DNA methylation.

3 Failure to reduce proliferation after 2 weeks of endocrine treatment [16, 35] may well  
4 identify patients that are innately resistant; however, acquired resistance remains a greater  
5 challenge in terms of identifying biomarkers and appropriate alternative or combination  
6 therapies [36]. Many of the transcriptomic changes identified in long-term treated dormant  
7 tumours are shared by some, but not all resistant tumours, providing further evidence of  
8 resistance heterogeneity [37] where dormant tumours share similar molecular changes, but  
9 there are a variety of escape mechanisms that lead to acquired resistance.

10 In the present study, paired differential expression analysis demonstrated that dormant  
11 tumours continue to change under long-term treatment. Some of the identified dormancy-  
12 related pathways such as cell cycle arrest and senescence have established roles in metastasis  
13 dormancy [38] further supporting the relevance of our clinical model, with senescence-  
14 associated secretory phenotype (SASP) recently suggested to regulate breast cancer  
15 dormancy and relapse [39]. As in short-term responsive tumours [16], ECM organization and  
16 degradation were significantly up-regulated in dormant tumours. ECM remodelling and its  
17 degradation by matrix metalloproteases (MMP) have previously been suggested to regulate  
18 the switch between dormancy and metastatic growth [40].

19 The most up-regulated gene in resistant tumours *S100P*, previously shown to be an inducer of  
20 breast cancer metastasis correlated with decreased survival [41]. Recently, *S100P*  
21 hypomethylation in blood was demonstrated to be inversely correlated with tissue *S100P*  
22 expression and significantly associated with breast cancer, implicating *S100P* as a potential  
23 diagnostic marker [42]. High plasma *S100P* levels have also been correlated with poor  
24 prognosis in metastatic breast cancer patients, with levels decreasing following treatment,  
25 suggesting a role of *S100P* in dynamic monitoring of response [43]. In the present study,

1 S100P gene expression and protein levels were significantly higher in resistant tumours after  
2 long-term treatment, as well as being differentially expressed before treatment supporting its  
3 potential role as a therapeutic target [44] and a predictive marker.

4 Comparative analysis of dormant and resistant samples after extended treatment revealed a  
5 set of genes enriched for DNA methylation and histone acetylation/deacetylation, indicating  
6 the involvement of epigenetic regulation in escape from dormancy. Epigenetic alterations are  
7 recognized to occur in breast cancer. DNA methyltransferase (DNMT) and HDAC inhibitors  
8 have been shown to exert encouraging effects in the disease [45]. Recently, the potential role  
9 of epigenetic changes in regulating dormancy and reactivation state has been suggested to  
10 explain the reversible (on/off) nature of dormancy [46].

11 Breast cancer “CpG island methylator phenotype” (CIMP), revealed by genome-wide  
12 methylation analysis of metastatic breast cancers where a large number of genes are  
13 hypermethylated, and has been suggested to be informative for metastatic potential [47]. A  
14 significant correlation between pre-treatment global DNA methylation with neoadjuvant  
15 chemotherapy response in rectal cancer has been reported [48]. Though DNA  
16 hypomethylation was the first epigenetic alteration identified in cancer, its molecular process  
17 and effects are not well understood yet [49]. In addition, 5-hmC levels were shown to  
18 correlate with differentiation status, with higher levels in more differentiated [29]. In  
19 addition, alterations in DNA methylation in LTED MCF7 cells have been previously reported  
20 [50]. Our results provide evidence for loss of global DNA methylation process in resistant  
21 tumours and strengthen the case to use these models for further study. The global decrease in  
22 5-mC may account for the observed reduction in 5-hmC levels, since 5-mC is converted to 5-  
23 hmC. On the other hand, at early-on time point, 5-hmC levels were significantly reduced with  
24 no significant change in 5-mC levels suggesting an independent role of 5-hmC mark.  
25 Hypomethylated cancer cells have been suggested to be selected to form tumours with

1 increased malignancy [49]. We suggest that hypomethylation in resistant tumours may reflect  
2 dedifferentiation process inducing stem-cell-like cell formation. Determining the time point  
3 at which that hypomethylation starts, which would allow intervening before it starts to  
4 prevent therapy resistance, needs further investigation.

5 The main genes significantly enriched for epigenetics-associated pathways in the present  
6 study are core histone (H3, H4, H2B) genes. Well-known epigenetics-associated genes such  
7 as DNA methyltransferase (DNMT) were not differentially expressed in the present study.  
8 Therefore, it might be suggested that observed changes in histone gene levels may simply  
9 reflect the high proliferation rate in resistant tumours. Although these histone genes are  
10 replication-dependent and their levels increase during DNA replication [51], we suggest that  
11 elevated levels may also result from disrupted DNA replication and packaging. Deregulation  
12 of histone H2A and H2B were associated with anthracycline resistance in breast cancer cells  
13 and reversed by HDAC small molecule inhibitors [52]. Furthermore, up-regulation of  
14 replication-dependent core histone proteins has been suggested to be selective indicator of  
15 ER-mediated MCF7 cell proliferation regardless of proliferation-rate [53]. Also, observed  
16 global loss of DNA methylation in resistant tumours suggests dynamic regulation of gene  
17 transcription under letrozole therapy. Therefore, histone up-regulation and alterations in  
18 epigenetic pathways observed in our study may mediate reactivation of ER signalling in  
19 resistant tumours, rather than simply mirroring the degree of proliferation.

20 Our results indicate alterations both in DNA methylation, and histone modifications  
21 suggesting a cooperative interplay between them to mediate acquired resistance. HDAC  
22 inhibitors, which have been shown to regulate DNA methylation [54], may be successful  
23 clinically as second-line drugs alone or in combination following endocrine therapy failure as  
24 there is growing evidence for their tumour selective action [55, 56]. A time-dependent role  
25 for HDACs in leukaemia has been shown [57] and may also be critical in determining when

1 to start HDAC inhibition therapy to successfully treat endocrine resistant patients. Whether or  
2 not the epigenetic alterations are triggers of reawakening and if the timely use of epigenetic  
3 drugs can prevent acquired resistance warrants further investigation.

#### 4 **Conclusions**

5 We have performed the first study of sequential tumour samples from breast cancer patients  
6 receiving extended neoadjuvant endocrine treatment as a clinical model of dormancy and  
7 acquired resistance. Our analysis suggests that molecular differences between dormant and  
8 resistant tumours are initially subtle, becoming more obvious only after extended treatment.  
9 This study emphasizes alterations in DNA methylation in the first months of treatment may  
10 predict which patients will eventually develop acquired resistance. We provide valuable  
11 evidence that epigenetic drugs such as HDAC inhibitors may have a role in treating endocrine  
12 resistance.

13



## 1 **Abbreviations**

2 5-hmC: 5-hydroxymethylcytosine; 5-mC: 5-methylcytosine; CIMP: CpG island methylator  
3 phenotype; cMap: Connectivity map; DAB: 3,3'-diaminobenzidine; DNMT: DNA  
4 methyltransferase; ECM: extracellular matrix; ER: oestrogen receptor; FASP: Filter Aided  
5 Sample Preparation; FDR: false discovery rate; FFPE: formalin-fixed paraffin embedded;  
6 HATs: histone acetyl transferases; HCl: hydrochloric acid; HDAC: histone deacetylase; HRP:  
7 horseradish peroxidase; LFQ: Label-free Quantitation; LTED: long-term oestrogen  
8 deprived; MDS: multidimensional scaling; MMP: matrix metalloproteases; SASP:  
9 senescence-associated secretory phenotype; ssGSEA: Single-sample Gene Set Enrichment  
10 Analysis.

## 11 **Declarations**

12 *Ethics approval and consent to participate*

13 All patients provided informed consent and sample collection was approved by the local  
14 research ethics committee (Lothian Local Research Ethics Committee 03, REC Reference  
15 number 07/S1103/26, approval date 13/08/2007).

16 *Consent for publication*

17 Not applicable

18 *Availability of data and material*

19 The microarray dataset generated during the current study is available in NCBI GEO under  
20 accession GSE111563 [<https://www.ncbi.nlm.nih.gov/geo/query/acc.cgi?acc=GSE111563>].

21 The analysis also includes previously published microarray data under accession numbers  
22 GSE59515 [<https://www.ncbi.nlm.nih.gov/geo/query/acc.cgi?acc=GSE59515>], and  
23 GSE55374 [<https://www.ncbi.nlm.nih.gov/geo/query/acc.cgi?acc=GSE55374>]. The  
24 proteomics dataset generated during the current study is available in PRIDE with the

1 identifier PXD009328 [<https://www.ebi.ac.uk/pride/archive/>]. Publicly available resistant cell  
2 line gene expression datasets GSE10879  
3 [<https://www.ncbi.nlm.nih.gov/geo/query/acc.cgi?acc=GSE10879>], GSE10911 [58],  
4 GSE20361 [59], GSE50820 [60], GSE75971 [61], GSE14986 [62], GSE74391 [63] were also  
5 analysed.

### 6 *Competing interests*

7 The authors declare that they have no potential conflicts of interest.

### 8 *Funding*

9 The work was supported Marie Skłodowska-Curie Individual Fellowship (H2020-MSCA-IF,  
10 658170) to CS. AHS and JMD are very grateful for funding provided by Breast Cancer Now.  
11 The work was partly supported by Wellcome Trust Institutional Fund (ISSF3) to CS and  
12 AHS.

### 13 *Authors' contributions*

14 AT, JMD and AHS conceived the study. CS and AT generated the transcriptome dataset. JW  
15 conducted proteomics and supported proteomics data analysis. DP, AL, and AHS provided  
16 help with the data analysis. AF and LR provided technical support with tissue collection and  
17 processing. LR, JST, and JMD co-ordinated the collection and assessment of clinical  
18 samples. CS analysed and interpreted the data and drafted the manuscript. AHS supervised  
19 the project and helped to write and edit the manuscript. All authors read and approved the  
20 final manuscript.

### 21 *Acknowledgements*

22 Not applicable

### 23 *Authors' information*

24 Not applicable

## 1 References

- 2 1. EBCTCG. Aromatase inhibitors versus tamoxifen in early breast cancer: patient-level  
3 meta-analysis of the randomised trials. *Lancet*. 2015;386(10001):1341-1352.
- 4 2. Demicheli R, Ardoino I, Boracchi P, Coradini D, Agresti R, Ferraris C, et al. Recurrence  
5 and mortality according to estrogen receptor status for breast cancer patients undergoing  
6 conservative surgery. Ipsilateral breast tumour recurrence dynamics provides clues for  
7 tumour biology within the residual breast. *BMC Cancer*. 2010;10:656.
- 8 3. Pan HC, Gray R, Braybrooke J, Davies C, Taylor C, McGale P, et al. 20-Year Risks of  
9 Breast-Cancer Recurrence after Stopping Endocrine Therapy at 5 Years. *N Engl J Med*.  
10 2017;377(19):1836-1846.
- 11 4. Weigelt B, Glas AM, Wessels LF, Witteveen AT, Peterse JL, van't Veer LJ. Gene  
12 expression profiles of primary breast tumors maintained in distant metastases. *Proc Natl*  
13 *Acad Sci U S A*. 2003;100(26):15901-15905.
- 14 5. Tang MH, Dahlgren M, Brueffer C, Tjitrowirjo T, Winter C, Chen Y, et al. Remarkable  
15 similarities of chromosomal rearrangements between primary human breast cancers and  
16 matched distant metastases as revealed by whole-genome sequencing. *Oncotarget*.  
17 2015;6(35):37169-37184.
- 18 6. Kroigard AB, Larsen MJ, Thomassen M, Kruse TA. Molecular Concordance Between  
19 Primary Breast Cancer and Matched Metastases. *Breast J*. 2016;22(4):420-430.
- 20 7. Demicheli R, Terenziani M, Bonadonna G. Estimate of tumor growth time for breast  
21 cancer local recurrences: rapid growth after wake-up? *Breast Cancer Res Treat*.  
22 1998;51(2):133-137.
- 23 8. Uhr JW, Pantel K. Controversies in clinical cancer dormancy. *Proc Natl Acad Sci U S A*.  
24 2011;108(30):12396-12400.
- 25 9. Sosa MS, Bragado P, Aguirre-Ghiso JA. Mechanisms of disseminated cancer cell  
26 dormancy: an awakening field. *Nat Rev Cancer*. 2014;14(9):611-622.
- 27 10. Dittmer J. Mechanisms governing metastatic dormancy in breast cancer. *Semin*  
28 *Cancer Biol*. 2017;44:72-82.
- 29 11. Selli C, Dixon JM, Sims AH. Accurate prediction of response to endocrine therapy in  
30 breast cancer patients: current and future biomarkers. *Breast Cancer Res*. 2016;18(1):118.
- 31 12. Clarke R, Tyson JJ, Dixon JM. Endocrine resistance in breast cancer--An overview  
32 and update. *Mol Cell Endocrinol*. 2015;418 Pt 3:220-234.
- 33 13. Ma CX, Reinert T, Chmielewska I, Ellis MJ. Mechanisms of aromatase inhibitor  
34 resistance. *Nature Reviews Cancer*. 2015;15(5):261-275.
- 35 14. Sims AH, Bartlett JMS. Approaches towards expression profiling the response to  
36 treatment. *Breast Cancer Res*. 2008;10(6).
- 37 15. Vendrell JA, Robertson KE, Ravel P, Bray SE, Bajard A, Purdie CA, et al. A  
38 candidate molecular signature associated with tamoxifen failure in primary breast cancer.  
39 *Breast Cancer Res*. 2008;10(5):R88.
- 40 16. Turnbull AK, Arthur LM, Renshaw L, Larionov AA, Kay C, Dunbier AK, et al.  
41 Accurate Prediction and Validation of Response to Endocrine Therapy in Breast Cancer. *J*  
42 *Clin Oncol*. 2015;33(20):2270-2278.
- 43 17. Dunbier AK, Ghazoui Z, Anderson H, Salter J, Nerurkar A, Osin P, et al. Molecular  
44 Profiling of Aromatase Inhibitor-Treated Postmenopausal Breast Tumors Identifies  
45 Immune-Related Correlates of Resistance. *Clin Cancer Res*. 2013;19(10):2775-2786.
- 46 18. Patani N, Dunbier AK, Anderson H, Ghazoui Z, Ribas R, Anderson E, et al.  
47 Differences in the transcriptional response to fulvestrant and estrogen deprivation in ER-  
48 positive breast cancer. *Clin Cancer Res*. 2014;20(15):3962-3973.

- 1 19. Arthur LM, Turnbull AK, Webber VL, Larionov AA, Renshaw L, Kay C, et al.  
2 Molecular changes in lobular breast cancers in response to endocrine therapy. *Cancer Res.*  
3 2014;74(19):5371-5376.
- 4 20. Turnbull AK, Kitchen RR, Larionov AA, Renshaw L, Dixon JM, Sims AH. Direct  
5 integration of intensity-level data from Affymetrix and Illumina microarrays improves  
6 statistical power for robust reanalysis. *BMC Med Genomics.* 2012;5:35.
- 7 21. Du P, Kibbe WA, Lin SM. lumi: a pipeline for processing Illumina microarray.  
8 *Bioinformatics.* 2008;24(13):1547-1548.
- 9 22. Yu G, He QY. ReactomePA: an R/Bioconductor package for reactome pathway  
10 analysis and visualization. *Mol Biosyst.* 2016;12(2):477-479.
- 11 23. Hong FX, Breitling R, McEntee CW, Wittner BS, Nemhauser JL, Chory J. RankProd:  
12 a bioconductor package for detecting differentially expressed genes in meta-analysis.  
13 *Bioinformatics.* 2006;22(22):2825-2827.
- 14 24. Likhite N, Warawdekar UM. A unique method for isolation and solubilization of  
15 proteins after extraction of RNA from tumor tissue using trizol. *J Biomol Tech.*  
16 2011;22(1):37-44.
- 17 25. Coleman O, Henry M, Clynes M, Meleady P. Filter-Aided Sample Preparation  
18 (FASP) for Improved Proteome Analysis of Recombinant Chinese Hamster Ovary Cells.  
19 *Methods Mol Biol.* 2017;1603:187-194.
- 20 26. Rappsilber J, Ishihama Y, Mann M. Stop and go extraction tips for matrix-assisted  
21 laser desorption/ionization, nanoelectrospray, and LC/MS sample pretreatment in  
22 proteomics. *Anal Chem.* 2003;75(3):663-670.
- 23 27. Cox J, Mann M. MaxQuant enables high peptide identification rates, individualized  
24 p.p.b.-range mass accuracies and proteome-wide protein quantification. *Nat Biotechnol.*  
25 2008;26(12):1367-1372.
- 26 28. Vizcaino JA, Csordas A, Del-Toro N, Dianas JA, Griss J, Lavidas I, et al. 2016 update  
27 of the PRIDE database and its related tools. *Nucleic Acids Res.* 2016;44(22):11033.
- 28 29. Haffner MC, Chau A, Meeker AK, Esopi DM, Gerber J, Pellakuru LG, et al. Global  
29 5-hydroxymethylcytosine content is significantly reduced in tissue stem/progenitor cell  
30 compartments and in human cancers. *Oncotarget.* 2011;2(8):627-637.
- 31 30. Barbie DA, Tamayo P, Boehm JS, Kim SY, Moody SE, Dunn IF, et al. Systematic  
32 RNA interference reveals that oncogenic KRAS-driven cancers require TBK1. *Nature.*  
33 2009;462(7269):108-U122.
- 34 31. Lamb J, Crawford ED, Peck D, Modell JW, Blat IC, Wrobel MJ, et al. The  
35 connectivity map: Using gene-expression signatures to connect small molecules, genes,  
36 and disease. *Science.* 2006;313(5795):1929-1935.
- 37 32. Jang ER, Lim SJ, Lee ES, Jeong G, Kim TY, Bang YJ, et al. The histone deacetylase  
38 inhibitor trichostatin A sensitizes estrogen receptor alpha-negative breast cancer cells to  
39 tamoxifen. *Oncogene.* 2004;23(9):1724-1736.
- 40 33. Cao B, Li J, Zhu J, Shen M, Han K, Zhang Z, et al. The antiparasitic clioquinol  
41 induces apoptosis in leukemia and myeloma cells by inhibiting histone deacetylase  
42 activity. *J Biol Chem.* 2013;288(47):34181-34189.
- 43 34. Chen EY, Tan CM, Kou Y, Duan Q, Wang Z, Meirelles GV, et al. Enrichr: interactive  
44 and collaborative HTML5 gene list enrichment analysis tool. *BMC Bioinformatics.*  
45 2013;14:128.
- 46 35. Ellis MJ, Suman VJ, Hoog J, Goncalves R, Sanati S, Creighton CJ, et al. Ki67  
47 Proliferation Index as a Tool for Chemotherapy Decisions During and After Neoadjuvant  
48 Aromatase Inhibitor Treatment of Breast Cancer: Results From the American College of  
49 Surgeons Oncology Group Z1031 Trial (Alliance). *J Clin Oncol.* 2017;35(10):1061-1069.

- 1 36. Jankowitz RC, Oesterreich S, Lee AV, Davidson NE. New Strategies in Metastatic  
2 Hormone Receptor-Positive Breast Cancer: Searching for Biomarkers to Tailor Endocrine  
3 and Other Targeted Therapies. *Clin Cancer Res.* 2017;23(5):1126-1131.
- 4 37. Miller WR, Larionov A. Changes in expression of oestrogen regulated and  
5 proliferation genes with neoadjuvant treatment highlight heterogeneity of clinical  
6 resistance to the aromatase inhibitor, letrozole. *Breast Cancer Res.* 2010;12(4):R52.
- 7 38. Zhang XHF, Giuliano M, Trivedi MV, Schiff R, Osborne CK. Metastasis Dormancy  
8 in Estrogen Receptor-Positive Breast Cancer. *Clin Cancer Res.* 2013;19(23):6389-6397.
- 9 39. Bartosh TJ. Cancer cell cannibalism and the SASP: Ripples in the murky waters of  
10 tumor dormancy. *Mol Cell Oncol.* 2017;4(1):e1263715.
- 11 40. Barkan D, Green JE, Chambers AF. Extracellular matrix: a gatekeeper in the  
12 transition from dormancy to metastatic growth. *Eur J Cancer.* 2010;46(7):1181-1188.
- 13 41. Wang G, Platt-Higgins A, Carroll J, de Silva Rudland S, Winstanley J, Barraclough  
14 R, et al. Induction of metastasis by S100P in a rat mammary model and its association  
15 with poor survival of breast cancer patients. *Cancer Res.* 2006;66(2):1199-1207.
- 16 42. Yang RX, Stocker S, Schott S, Heil J, Marme F, Cuk K, et al. The association  
17 between breast cancer and S100P methylation in peripheral blood by multicenter case-  
18 control studies. *Carcinogenesis.* 2017;38(3):312-320.
- 19 43. Peng C, Chen H, Wallwiener M, Modugno C, Cuk K, Madhavan D, et al. Plasma  
20 S100P level as a novel prognostic marker of metastatic breast cancer. *Breast Cancer Res  
21 Treat.* 2016;157(2):329-338.
- 22 44. Dakhel S, Padilla L, Adan J, Masa M, Martinez JM, Roque L, et al. S100P antibody-  
23 mediated therapy as a new promising strategy for the treatment of pancreatic cancer.  
24 *Oncogenesis.* 2014;3:e92.
- 25 45. Basse C, Arock M. The increasing roles of epigenetics in breast cancer: Implications  
26 for pathogenicity, biomarkers, prevention and treatment. *Int J Cancer.* 2015;137(12):2785-  
27 2794.
- 28 46. Crea F, Nur Saidy NR, Collins CC, Wang Y. The epigenetic/noncoding origin of  
29 tumor dormancy. *Trends Mol Med.* 2015;21(4):206-211.
- 30 47. Fang F, Turcan S, Rimmner A, Kaufman A, Giri D, Morris LG, et al. Breast cancer  
31 methylomes establish an epigenomic foundation for metastasis. *Sci Transl Med.*  
32 2011;3(75):75ra25.
- 33 48. Tsang JS, Vencken S, Sharaf O, Leen E, Kay EW, McNamara DA, et al. Global DNA  
34 methylation is altered by neoadjuvant chemoradiotherapy in rectal cancer and may predict  
35 response to treatment - A pilot study. *Ejso.* 2014;40(11):1459-1466.
- 36 49. De Smet C, Loriot A. DNA hypomethylation in cancer Epigenetic scars of a  
37 neoplastic journey. *Epigenetics.* 2010;5(3).
- 38 50. Pathiraja TN, Xi Y, Lee AV, Santen R, Gannon F, Kaiparettu B, et al. Estrogen  
39 Deprivation Results in Altered DNA Methylation Profile in Breast Cancer Cells - Role in  
40 Endocrine Resistance? *Cancer Res.* 2009;69(24):808s-808s.
- 41 51. Harris ME, Bohni R, Schneiderman MH, Ramamurthy L, Schumperli D, Marzluff  
42 WF. Regulation of histone mRNA in the unperturbed cell cycle: evidence suggesting  
43 control at two posttranscriptional steps. *Mol Cell Biol.* 1991;11(5):2416-2424.
- 44 52. Braunstein M, Liao L, Lyttle N, Lobo N, Taylor KJ, Krzyzanowski PM, et al.  
45 Downregulation of histone H2A and H2B pathways is associated with anthracycline  
46 sensitivity in breast cancer. *Breast Cancer Res.* 2016;18(1):16.
- 47 53. Zhu Z, Edwards RJ, Boobis AR. Increased expression of histone proteins during  
48 estrogen-mediated cell proliferation. *Environ Health Perspect.* 2009;117(6):928-934.

- 1 54. Sarkar S, Abujamra AL, Loew JE, Forman LW, Perrine SP, Faller DV. Histone  
2 Deacetylase Inhibitors Reverse CpG Methylation by Regulating DNMT1 through ERK  
3 Signaling. *Anticancer Res.* 2011;31(9):2723-2732.
- 4 55. Lee JH, Choy ML, Ngo L, Foster SS, Marks PA. Histone deacetylase inhibitor  
5 induces DNA damage, which normal but not transformed cells can repair. *Proc Natl Acad  
6 Sci U S A.* 2010;107(33):14639-14644.
- 7 56. Bolden JE, Shi W, Jankowski K, Kan CY, Cluse L, Martin BP, et al. HDAC  
8 inhibitors induce tumor-cell-selective pro-apoptotic transcriptional responses. *Cell Death  
9 Dis.* 2013;4:e519.
- 10 57. Ceccacci E, Minucci S. Inhibition of histone deacetylases in cancer therapy: lessons  
11 from leukaemia. *Br J Cancer.* 2016;114(6):605-611.
- 12 58. Masri S, Lui K, Phung S, Ye J, Zhou D, Wang X, et al. Characterization of the weak  
13 estrogen receptor alpha agonistic activity of exemestane. *Breast Cancer Res Treat.*  
14 2009;116(3):461-470.
- 15 59. Aguilar H, Sole X, Bonifaci N, Serra-Musach J, Islam A, Lopez-Bigas N, et al.  
16 Biological reprogramming in acquired resistance to endocrine therapy of breast cancer.  
17 *Oncogene.* 2010;29(45):6071-6083.
- 18 60. Milosevic J, Klinge J, Borg AL, Foukakis T, Bergh J, Tobin NP. Clinical instability  
19 of breast cancer markers is reflected in long-term in vitro estrogen deprivation studies.  
20 *BMC Cancer.* 2013;13.
- 21 61. Simigdala N, Gao Q, Pancholi S, Roberg-Larsen H, Zvelebil M, Ribas R, et al.  
22 Cholesterol biosynthesis pathway as a novel mechanism of resistance to estrogen  
23 deprivation in estrogen receptor-positive breast cancer. *Breast Cancer Res.* 2016;18.
- 24 62. Coser KR, Wittner BS, Rosenthal NF, Collins SC, Melas A, Smith SL, et al.  
25 Antiestrogen-resistant subclones of MCF-7 human breast cancer cells are derived from a  
26 common monoclonal drug-resistant progenitor. *Proc Natl Acad Sci U S A.*  
27 2009;106(34):14536-14541.
- 28 63. Alves CL, Elias D, Lyng M, Bak M, Kirkegaard T, Lykkesfeldt AE, et al. High CDK6  
29 Protects Cells from Fulvestrant-Mediated Apoptosis and is a Predictor of Resistance to  
30 Fulvestrant in Estrogen Receptor-Positive Metastatic Breast Cancer. *Clin Cancer Res.*  
31 2016;22(22):5514-5526.

32

1 **Fig. 1** Long-term endocrine therapy as a clinical model to investigate breast cancer dormancy  
2 and acquired resistance. **a** Extended (4-45 months) letrozole treatment was exploited as a  
3 clinical model of breast cancer dormancy and acquired resistance. Sequential clinical samples  
4 from the same patient with no surgery and extended treatment were used to model clinical  
5 breast cancer dormancy and resistance. Before (pre,  $\leq 0$  days), early-on (early, 13-120 days)  
6 and long-term (long,  $>120$  days) neoadjuvant letrozole treatment. **b** Dynamic change in  
7 tumour size by USS and mean expression of proliferation markers MKI67, PCNA and  
8 MCM2 were used to classify patients into two categories, dormant (blue) and resistant (red).  
9 Overall comparisons of classifications per patient based on USS and mean change in  
10 proliferation markers with final classification are shown. **c** The duration of letrozole  
11 treatment (days) for samples, each bar represents a sample. **d** Intrinsic subtype classification  
12 by PAM50 at each timepoint. **e** Kaplan-Meier plot showing overall survival probability in  
13 dormant vs resistant patients (log-rank test). **f** Density plot showing the distribution of time to  
14 recurrence in dormant and resistant patients.

15 **Fig. 2** Distinct transcriptomic changes during long-term aromatase inhibitor treatment. **a**  
16 Unsupervised hierarchical clustering with most variant 500 features. **b** Multidimensional  
17 scaling (MDS) plot using most variant 500 genes across all timepoints. Each dot corresponds  
18 to a sample and sizes represent the duration of treatment. **c** Intra-patient (comparison of  
19 samples from the same patient) correlations are shown. Dormant (blue); resistant (red);  
20 Before (pre,  $\leq 0$  days), early-on (early, 13-120 days) and long-term (long,  $>120$  days)  
21 neoadjuvant letrozole treatment; \*\*\*  $p < 0.001$ ; \*\*  $p < 0.01$ ; \*  $p < 0.05$ .

22 **Fig. 3** Long-term endocrine treatment is associated with cell cycle, senescence, epigenetic  
23 regulation and ECM-associated pathways. Differentially expressed genes between pre-  
24 treatment and long-term treated samples of dormant (**a**) and resistant (**b**) patients were  
25 determined. Heat-maps showing change in down- and up-regulated genes' expression in

1 dormant (**a**) and resistant (**b**) samples. Each column represents a sample and each row a gene.  
2 Colours are log<sub>2</sub> mean-centred values with red indicating high values and blue indicating low  
3 expression. Bar plots on top of heat-maps represent the time on treatment (days) for each  
4 sample. **c-d** Graphs show dynamic changes in mean expression of differentially expressed  
5 genes in response classes. \*\*\*  $p < 0.001$ ; \*\*  $p < 0.01$ ; \*  $p < 0.05$ .

6 **Fig. 4** Comparative analysis of dormant and resistant tumours. **a** Volcano plot showing  
7 differentially expressed genes between long-term treated dormant and resistant tumours  
8 (dormancy vs resistance genes). Some up- and down-regulated genes in resistant tumours are  
9 highlighted in red and blue, respectively. **b** Significantly enriched pathways for dormancy vs  
10 resistance genes ( $p < 0.01$ ; ReactomePA). **c** Heatmap showing partial separation of long-term  
11 treated dormant and resistant samples using dormancy vs resistance genes. Colours are log<sub>2</sub>  
12 mean-centred values with red indicating high and blue indicating low expression. Genes are  
13 sorted by FC values from most to least up/down-regulated. Samples are sorted by sum  
14 expression of up-regulated genes. **d** Comparison of ssGSEA scores of dormancy vs resistance  
15 up-regulated genes between dormant and acquired resistant tumours. Dormant (blue);  
16 resistant (red); Before (pre,  $\leq 0$  days), early-on (early, 13-120 days) and long-term (long,  $>120$   
17 days) neoadjuvant letrozole treatment; \*\*\*  $p < 0.001$ ; \*  $p < 0.05$ .

18 **Fig. 5** Validation of results using *in vitro* gene expression data from resistant cell lines and  
19 proteomics analysis. **a** Normalised enrichment scores of differently up-regulated genes  
20 calculated using single sample gene set enrichment analysis (ssGSEA) in aromatase inhibitor  
21 -resistant cells. Scores were significantly higher (\*\*  $p < 0.01$ , \*\*\*  $p < 0.001$ ) in two  
22 aromatase inhibitor-resistant cell lines, MCF7:2A and MCF7:5C, which were clonally  
23 derived from MCF7 breast cancer cells following long-term estrogen deprivation (LTED)  
24 compared to control/sensitive MCF7 cells ( $n = 4$ ). Anastrozole-resistant (Ana\_R) and  
25 exemestane-resistant (Exe\_R) MCF7aro cells had significantly higher scores compared to



1 control (n = 3). **b** Dynamic changes in enrichment scores of LTED MCF7 cells in three  
2 different datasets. **c** Scores in tamoxifen-resistant (Tam\_R) and fulvestrant-resistant (Fulv\_R)  
3 and drug-sensitive (control) MCF7 cells (n = 4, n = 10; sc: subclone). **d** Volcano plot  
4 showing differentially expressed proteins between long-term treated dormant and resistant  
5 tumours ( $p < 0.05$ ). Some overlapping features between transcriptomics and proteomics  
6 analysis and the most up- and down- proteins are highlighted in red and blue, respectively

7 **Fig. 6** Immunohistochemical evaluation of **a** 5-methylcytosine (5-mC) and **b** 5-  
8 hydroxymethylcytosine (5-hmC) in FFPE sections from letrozole-treated samples.  
9 Representative images in dormant and resistant tumours are shown. Boxplots show  
10 distributions of semi-quantitative intensity scores of 5-mC (\*  $p < 0.05$ , \*\*\*  $p < 0.001$ , n = 5-  
11 12) and 5-hmC (\*\*\*  $p < 0.001$ , n = 5-13) levels in dormant and resistant patients. Early-on  
12 (early, 13-120 days) and long-term (long, >120 days) neoadjuvant letrozole treatment.

13

- 1 **Additional files**
- 2 **Additional file 1: FigureS1.** Consort diagram showing the cohort and sample sizes. Patient
- 3 and sample sizes in each group are shown with inclusion and exclusion criteria. (JPG 81 kb)
- 4 **Additional file 2: TableS1-S7.** Tables for lists of differentially expressed genes and proteins,
- 5 and enriched pathways. **Table S1.** Differentially expressed genes between long-term treated
- 6 and pre-treatment samples of dormant patients. **Table S2.** Enriched pathways for
- 7 differentially expressed genes between long-term treated and pre-treatment samples of
- 8 dormant patients. **Table S3.** Differentially expressed genes between long-term treated and
- 9 pre-treatment samples of acquired resistant patients. **Table S4.** Enriched pathways for
- 10 differentially expressed genes between long-term treated and pre-treatment samples of
- 11 acquired resistant patients. **Table S5.** Differentially expressed genes between long-term
- 12 treated dormant and resistant tumours. **Table S6.** Enriched pathways for differentially
- 13 expressed genes between long-term treated dormant and resistant tumours. **Table S7.**
- 14 Differentially expressed proteins between long-term treated dormant and resistant tumours.
- 15 (XLSX 283 kb)
- 16

1 **Table 1.** Patient characteristics.

|                                      | <b>Dormant</b><br>n (%) | <b>Resistant</b><br>n (%) | <b>Total</b><br>n | <b>p value*</b> |
|--------------------------------------|-------------------------|---------------------------|-------------------|-----------------|
| <i>Total no of patients</i>          | 42                      | 20                        | 62                |                 |
| <i>Total no of samples</i>           | 111                     | 56                        | 167               |                 |
| <i>Age at diagnosis</i>              |                         |                           |                   |                 |
| Mean                                 | 75                      | 72                        |                   |                 |
| Range                                | 53-87                   | 56-89                     |                   |                 |
| <i>Tumour grade</i>                  |                         |                           |                   | 0.39            |
| 1                                    | 6 (14.3)                | 1 (5.0)                   | 7                 |                 |
| 2                                    | 27 (64.3)               | 10 (50.0)                 | 37                |                 |
| 3                                    | 8 (19.0)                | 6 (30.0)                  | 14                |                 |
| NA                                   | 1 (2.4)                 | 3 (15.0)                  | 4                 |                 |
| <i>Tumour size</i>                   |                         |                           |                   | 0.71            |
| T1                                   | 5 (11.9)                | 4 (20.0)                  | 9                 |                 |
| T2                                   | 19 (45.2)               | 9 (45.0)                  | 28                |                 |
| T3                                   | 2 (4.8)                 | 2 (10.0)                  | 4                 |                 |
| T4                                   | 11 (26.2)               | 4 (20.0)                  | 15                |                 |
| NA                                   | 5 (11.9)                | 1 (5.0)                   | 6                 |                 |
| <i>Nodal status</i>                  |                         |                           |                   | 0.36            |
| N0                                   | 27 (64.3)               | 11 (55.0)                 | 38                |                 |
| N1                                   | 8 (19.0)                | 7 (35.0)                  | 15                |                 |
| N2                                   | 1 (2.4)                 | 1 (5.0)                   | 2                 |                 |
| N3                                   | 1 (2.4)                 | 0                         | 1                 |                 |
| NX                                   | 1 (2.4)                 | 0                         | 1                 |                 |
| NA                                   | 4 (9.5)                 | 1 (5.0)                   | 5                 |                 |
| <i>Metastasis status</i>             |                         |                           |                   | 1.00            |
| M0                                   | 34 (80.9)               | 18 (90.0)                 | 56                |                 |
| M1                                   | 2 (4.8)                 | 0                         | 2                 |                 |
| MX                                   | 1 (2.4)                 | 1 (5.0)                   | 2                 |                 |
| NA                                   | 5 (11.9)                | 1 (5.0)                   | 6                 |                 |
| <i>ER score (Allred)</i>             |                         |                           |                   | 0.18            |
| 6                                    | 1 (2.4)                 | 0                         | 1                 |                 |
| 7                                    | 6 (14.3)                | 6 (30.0)                  | 12                |                 |
| 8                                    | 35 (83.3)               | 14 (70.0)                 | 49                |                 |
| <i>HER status</i>                    |                         |                           |                   | 0.69            |
| Negative                             | 35 (83.3)               | 12 (60.0)                 | 47                |                 |
| Positive                             | 6 (14.3)                | 3 (15.0)                  | 9                 |                 |
| NA                                   | 1 (2.4)                 | 5 (25.0)                  | 6                 |                 |
| <i>Molecular subtype<sup>#</sup></i> |                         |                           |                   | 1.00            |
| Luminal A                            | 21 (50.0)               | 9 (45.0)                  | 30                |                 |
| Luminal B                            | 20 (47.6)               | 9 (45.0)                  | 29                |                 |
| HER2 enriched                        | 0                       | 1 (5.0)                   | 1                 |                 |
| Basal-like                           | 0                       | 0                         | 0                 |                 |
| Normal-like                          | 0                       | 0                         | 0                 |                 |
| NA                                   | 1 (2.4)                 | 1 (5.0)                   | 2                 |                 |

2 \*Fisher exact test ( $p < 0.05$  two-tailed) <sup>#</sup>At diagnosis by PAM50 (genefu) NA: not available

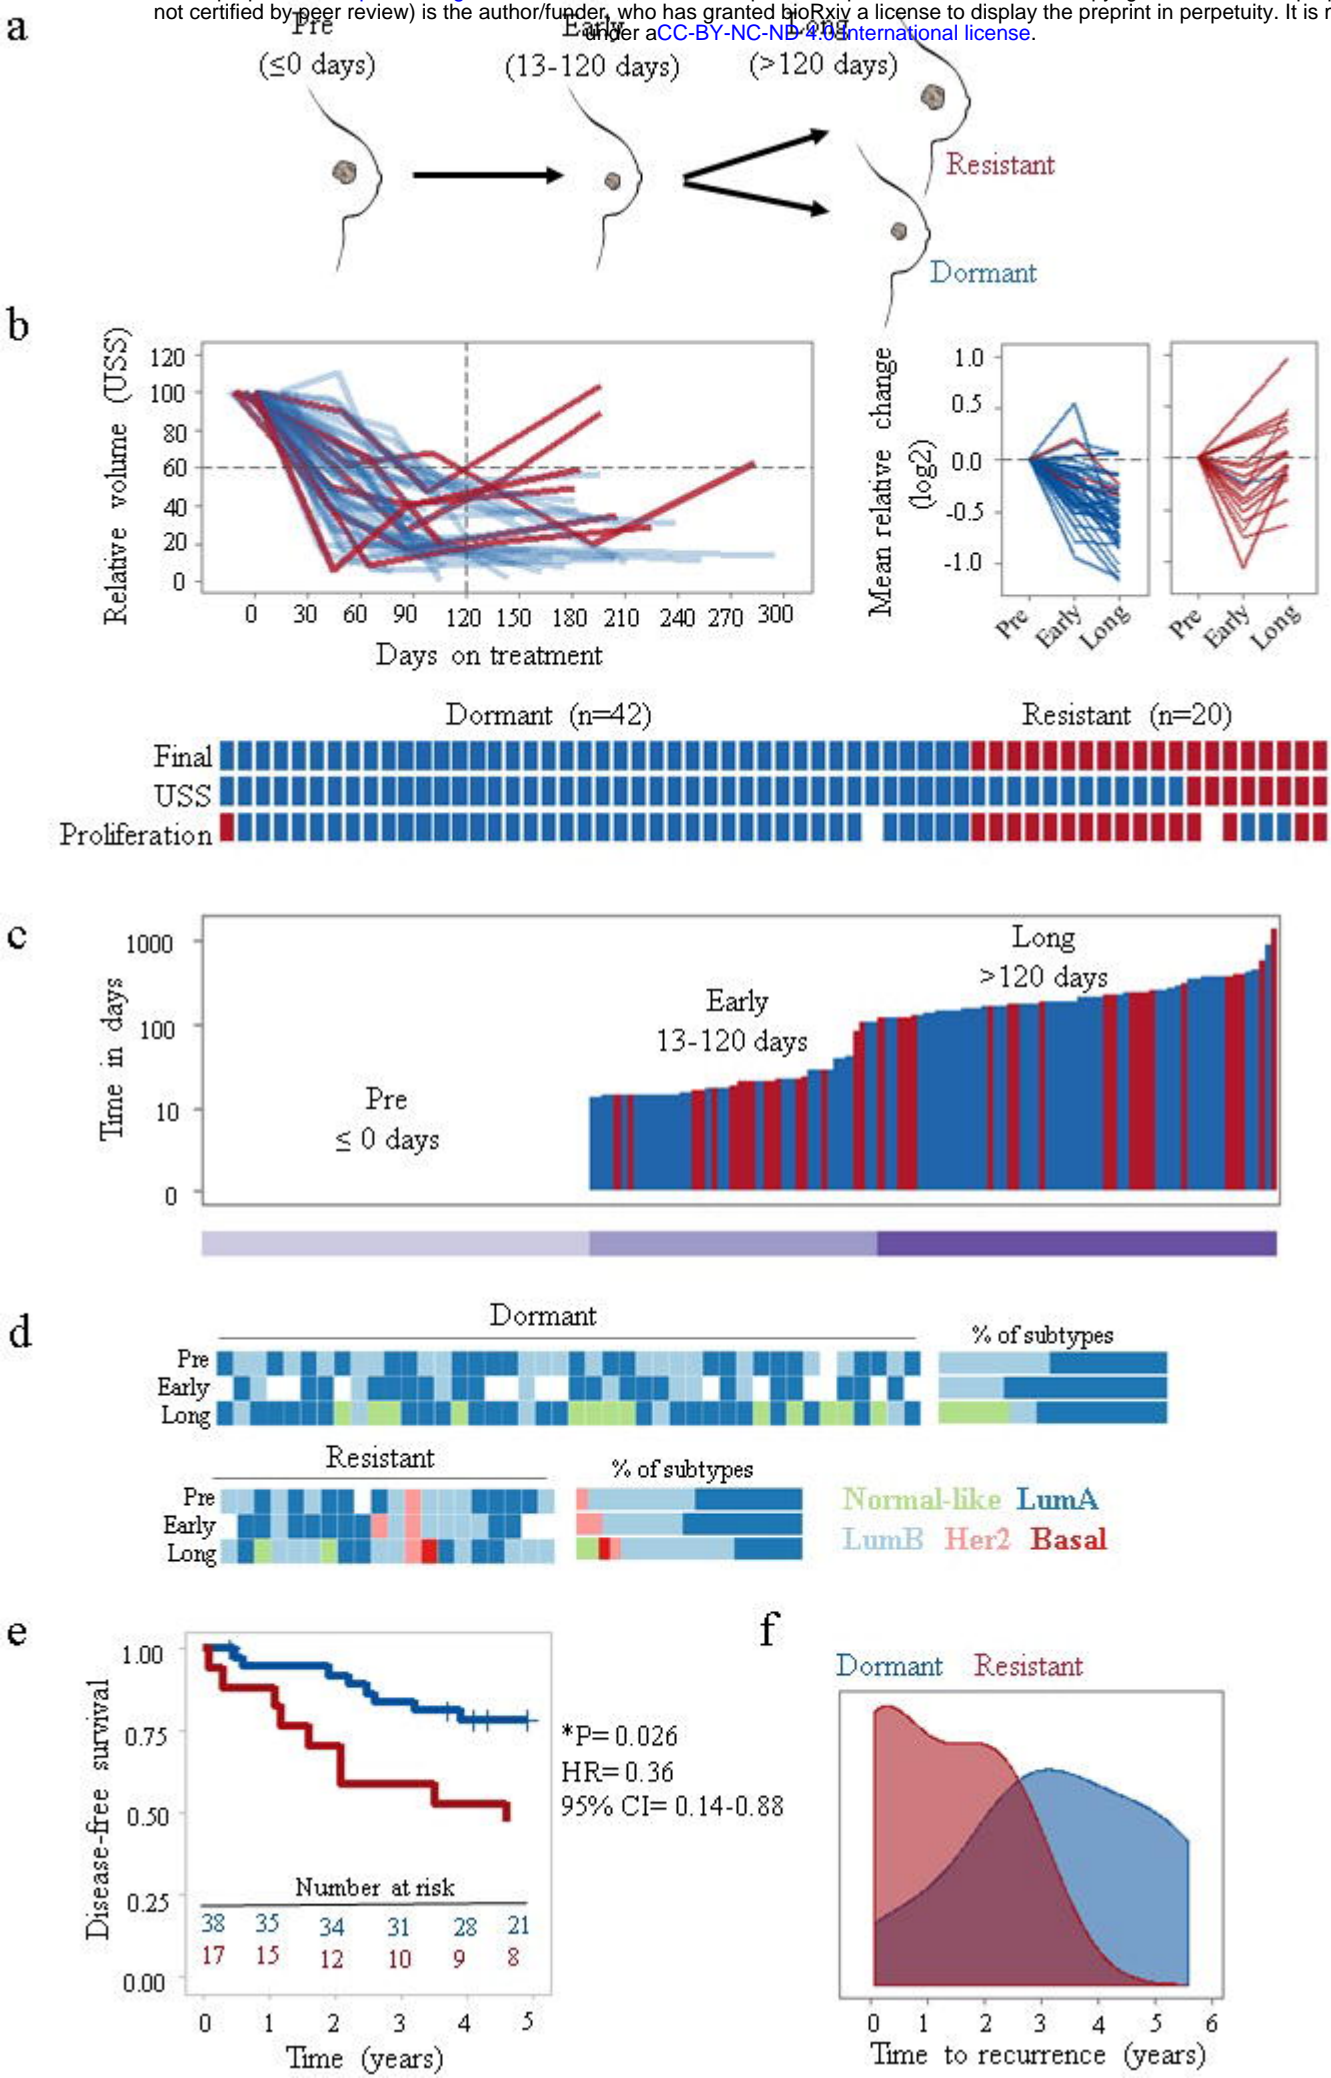

a

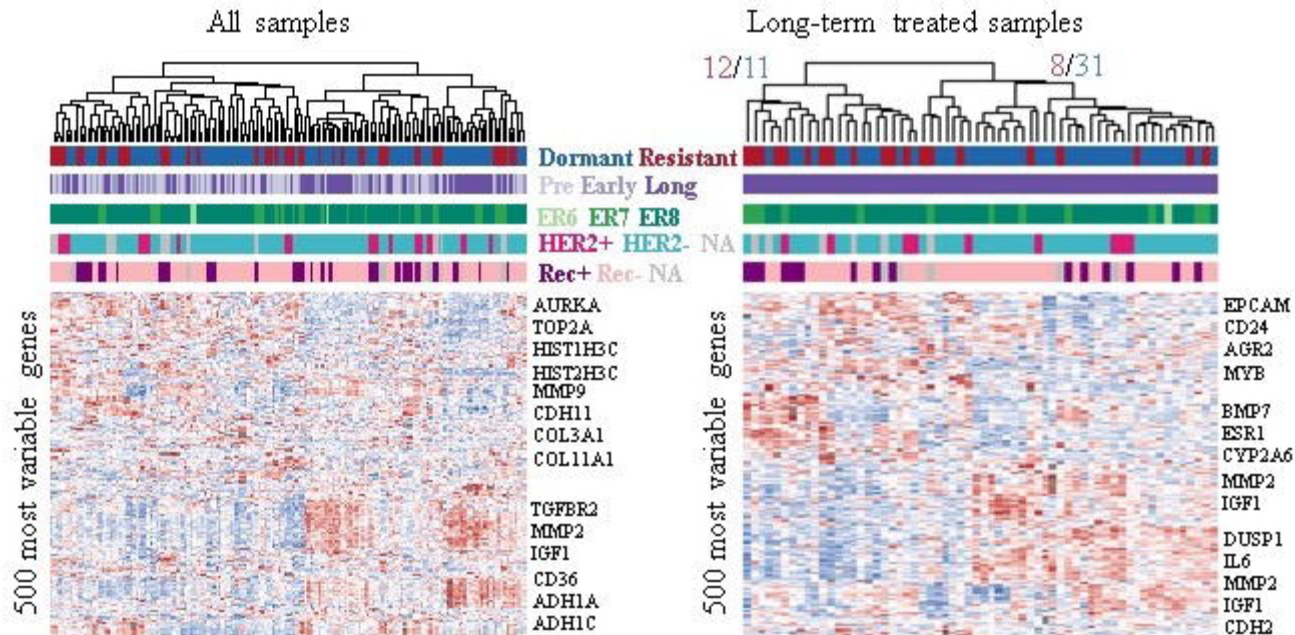

b

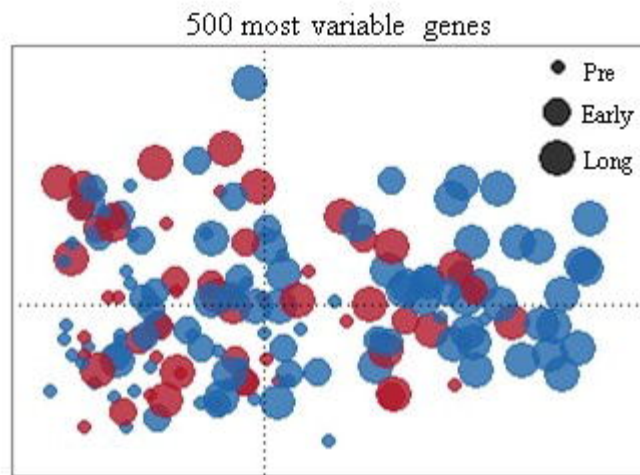

c

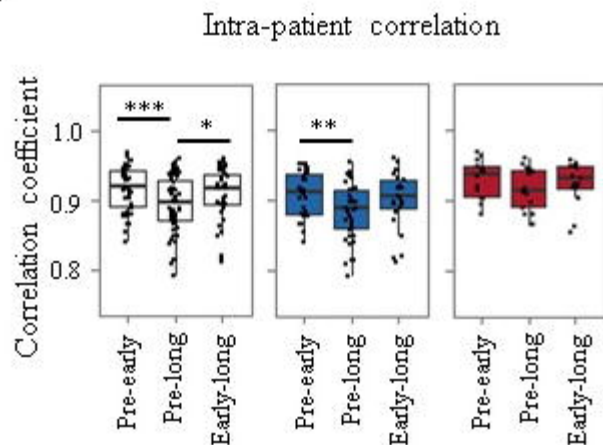

**a**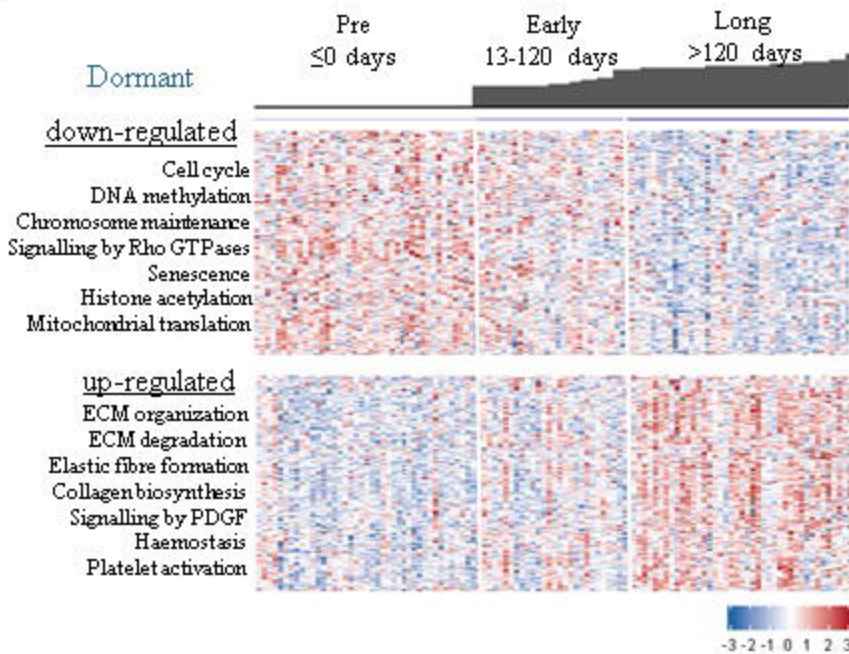**b**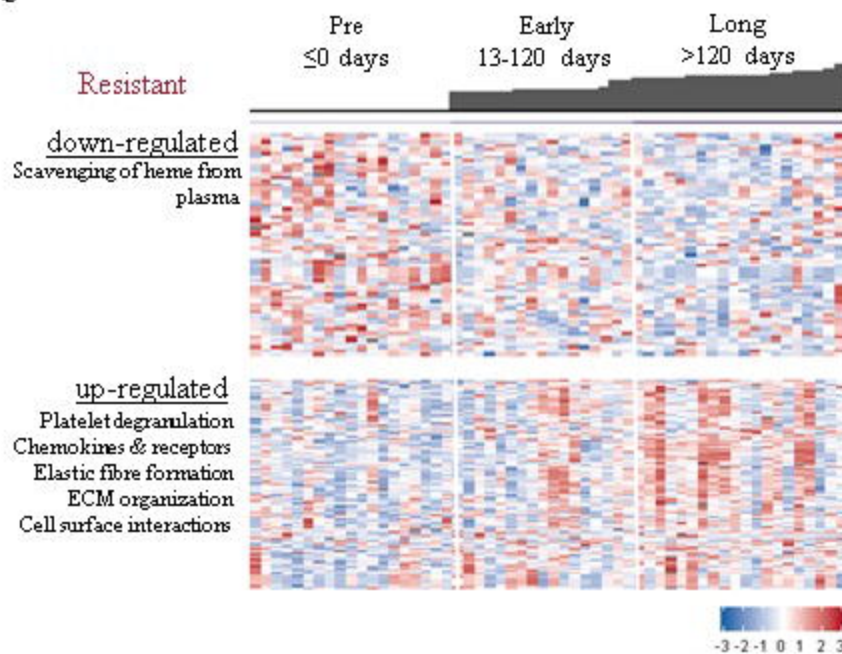**c**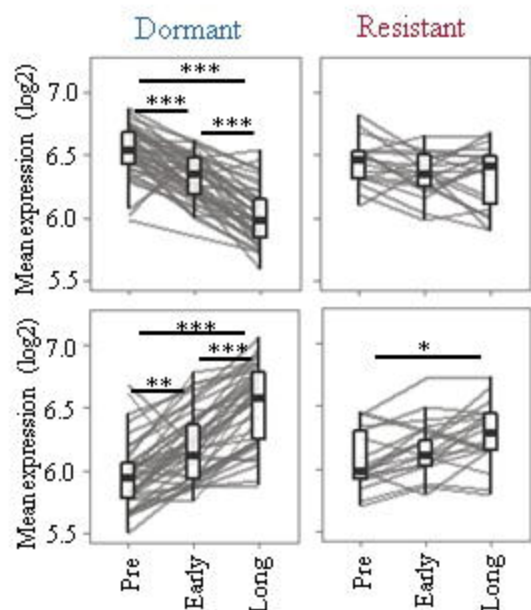**d**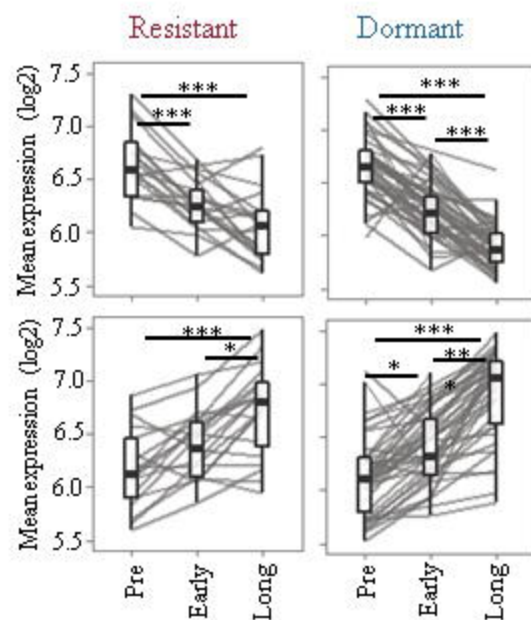

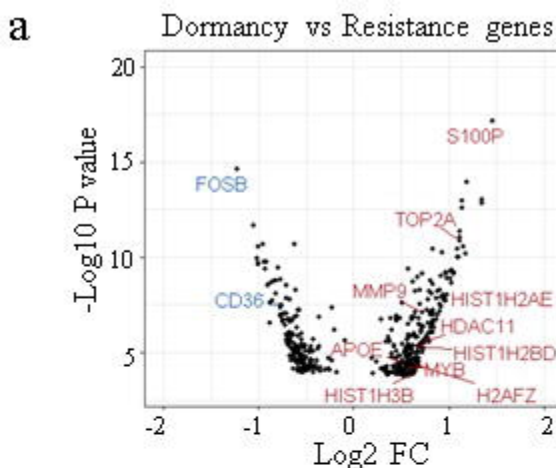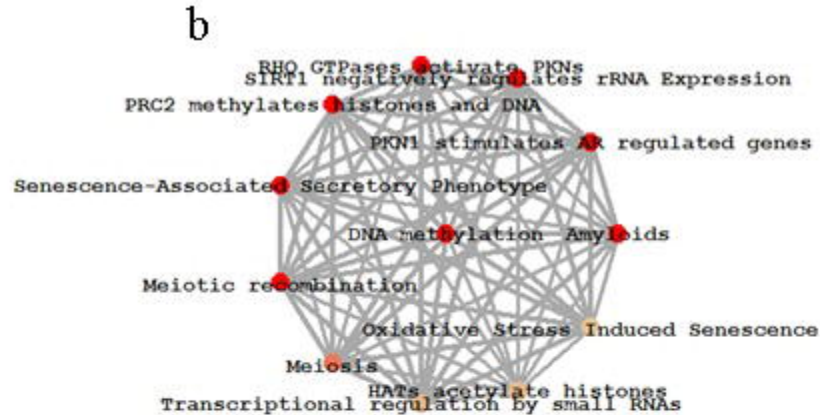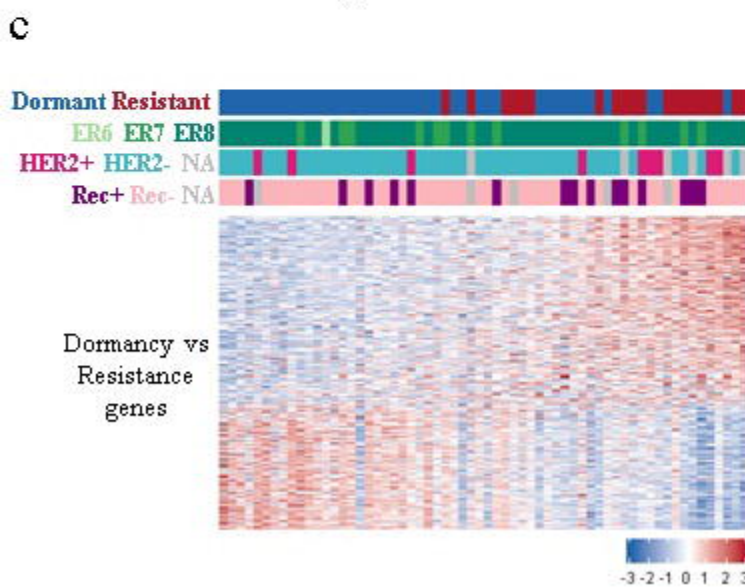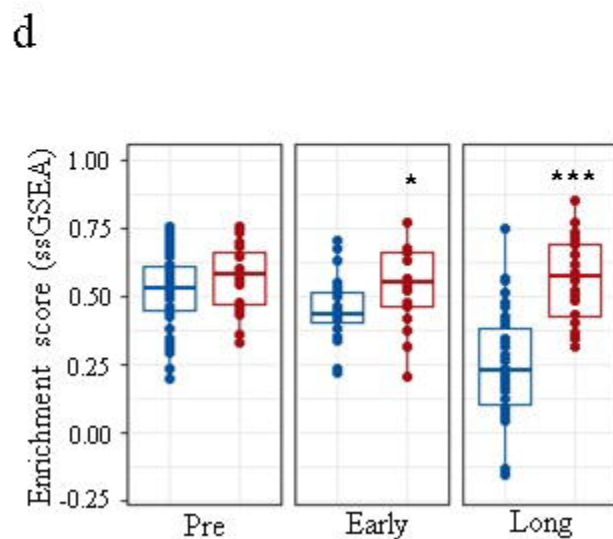

**a**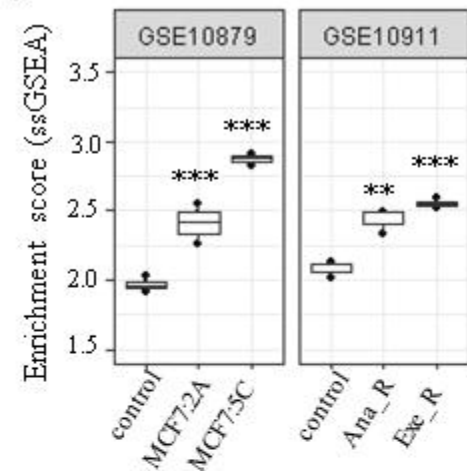**b**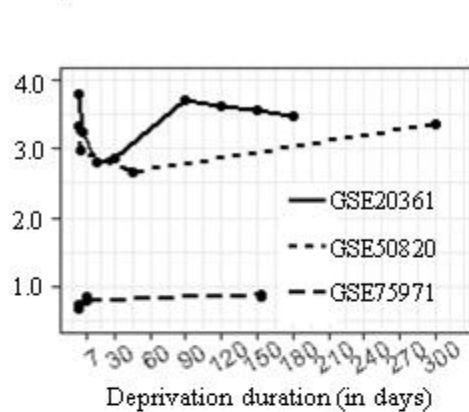**c**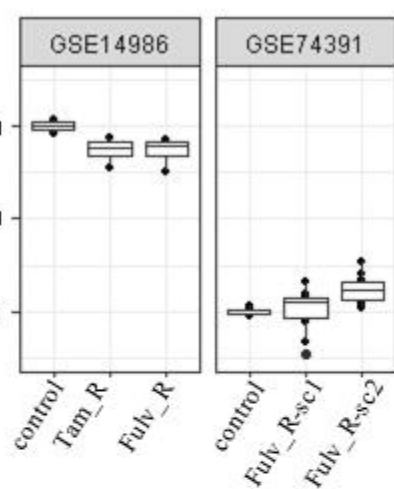**d**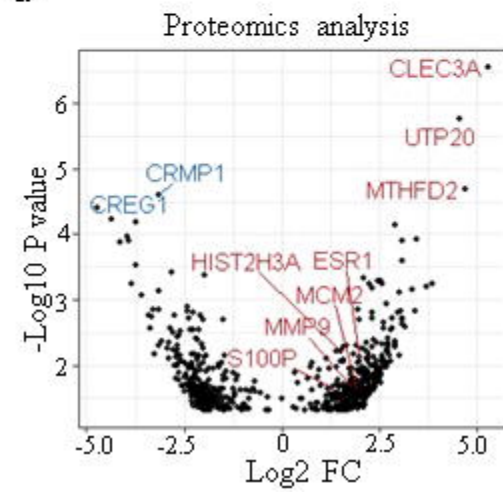



**a** 5-methylcytosine (5-mC)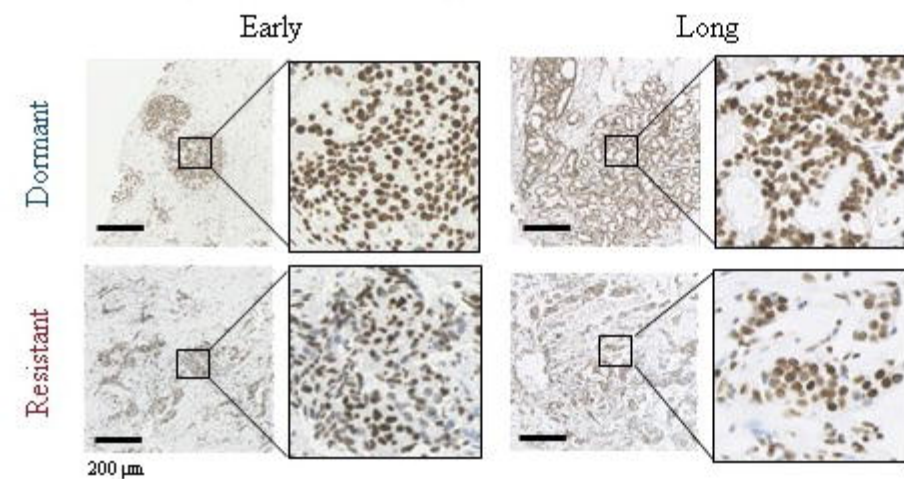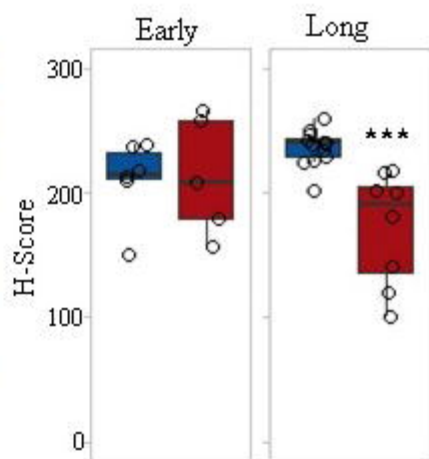**b** 5-hydroxymethylcytosine (5-hmC)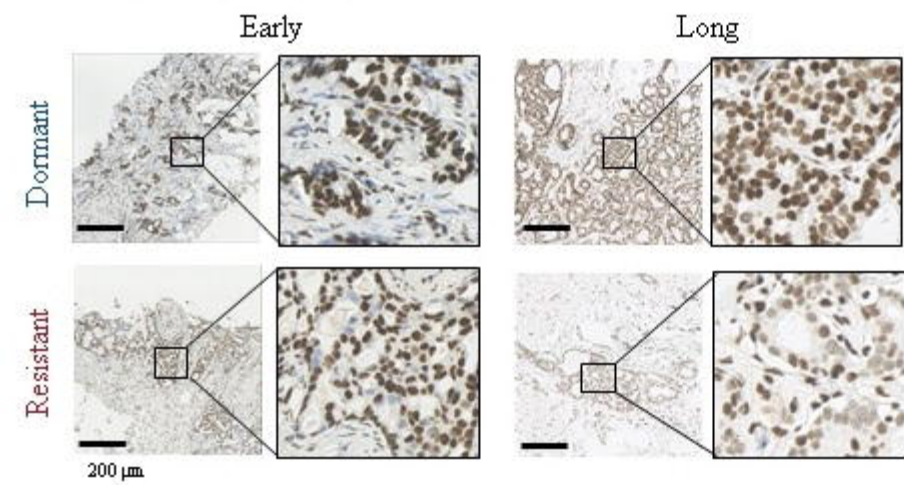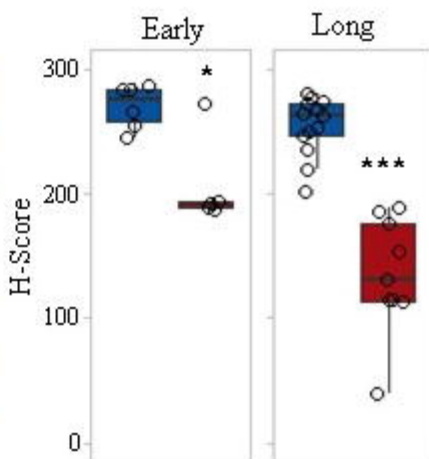

Source: https://www.biorxiv.org/content/10.1101/426155v1.full.pdf
